# Supplementary material for: Targeting MCL-1 triggers DNA damage and an anti-proliferative response independent from apoptosis induction
Source: PubMed Central journal article supplement — Cell Rep. Author manuscript; Available in PMC 2024 Oct 31. (PMC10787359; doi:10.1016/j.celrep.2023.113176), 2023-09-27
Supplement: NIHMS1954684-supplement-FigS1-13.pdf [file NIHMS1954684-supplement-FigS1-13.pdf]

**Cell Reports, Volume 42**

**Supplemental information**

**Targeting MCL-1 triggers DNA damage  
and an anti-proliferative response independent  
from apoptosis induction**

**Utsarga Adhikary, Joao A. Paulo, Marina Godes, Shrabasti Roychoudhury, Michelle S. Prew, Yael Ben-Nun, Ellen W. Yu, Amit Budhraj, Joseph T. Opferman, Dipanjan Chowdhury, Steven P. Gygi, and Loren D. Walensky**

**A**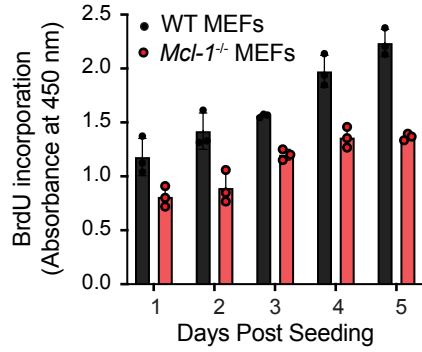**B**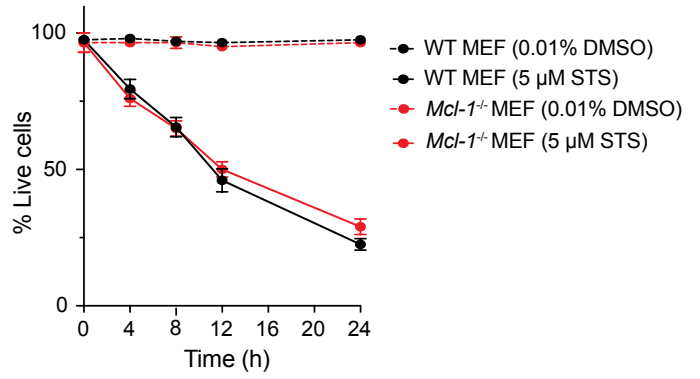**C**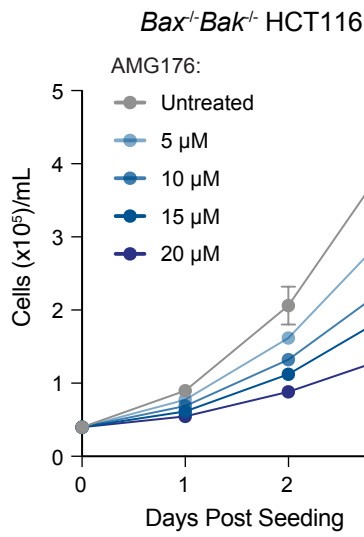**D**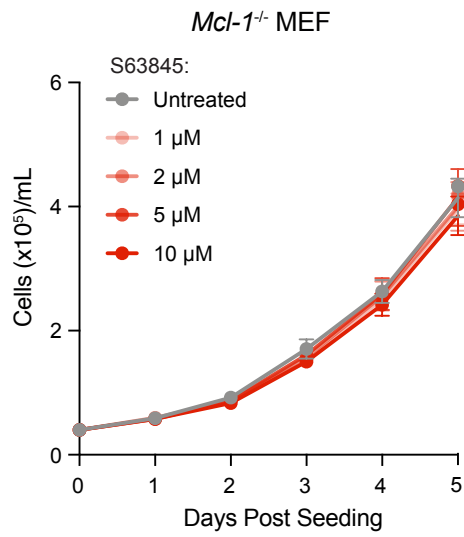**E**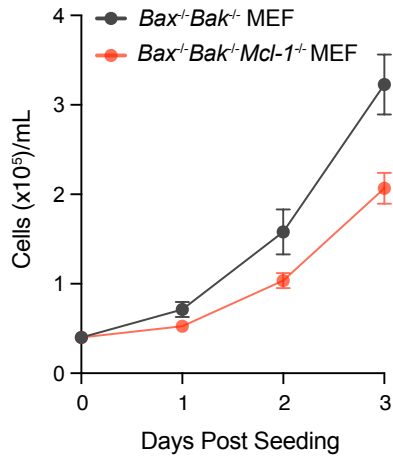

**Figure S1, Related to Figure 1. Proliferation and Viability of Cell Lines with Discrete Genetic Lesions Over Time and in Response to Drug Treatments.**

(A) Measurement of WT and *Mcl-1<sup>-/-</sup>* MEF cell proliferation at days 1-5 post seeding as assessed by BrdU assay. Data are mean  $\pm$  S.D. for experiments performed in technical triplicate and conducted twice with similar results.

(B) Measurement of percent viability of WT and *Mcl-1<sup>-/-</sup>* MEFs by trypan blue staining detected cell death induced by staurosporine at 4, 8, 12, and 24 hours post-treatment, whereas vehicle-treated cells maintained 100% viability. Data are mean  $\pm$  S.D. for experiments performed in technical duplicate and conducted twice using independent preparations of cells and drug, with similar results.

(C) Pharmacologic blockade of MCL-1 by AMG176 for 72 hours caused a dose-responsive decrease in cell proliferation of *Bax<sup>-/-</sup>Bak<sup>-/-</sup>* HCT116 cells compared to untreated cells, as measured by trypan blue staining and cell count. Data are mean  $\pm$  S.D. for experiments performed in technical duplicate and conducted twice using independent preparations of cells and drug with similar results.

(D) Treatment of *Mcl-1<sup>-/-</sup>* MEFs with S63845 had no effect on cell proliferation compared to untreated cells, as measured by trypan blue staining and cell count through day 5 post seeding. Data are mean  $\pm$  S.D. for experiments performed in technical duplicate and conducted twice using independent preparations of cells and drug, with similar results.

(E) Comparative cell proliferation of *Bax<sup>-/-</sup>Bak<sup>-/-</sup>* (DKO) and *Mcl-1<sup>-/-</sup>Bax<sup>-/-</sup>Bak<sup>-/-</sup>* (TKO) MEFs as measured by trypan blue staining and cell count at days 0-3 post seeding. Data are mean  $\pm$  S.D. for experiments performed in technical triplicate and conducted twice using independent preparations of cells.

| A                  |            |                            |
|--------------------|------------|----------------------------|
| MEF                |            |                            |
| Cell Viability (%) |            |                            |
| Days post seeding  | WT         | <i>Mcl-1<sup>-/-</sup></i> |
| 0                  | 96.5 ± 0.7 | 98.5 ± 0.7                 |
| 1                  | 98.5 ± 0.7 | 95.0 ± 0                   |
| 2                  | 94.5 ± 0.7 | 95.5 ± 2.1                 |
| 3                  | 98.0 ± 0   | 97.5 ± 2.1                 |

  

| B                  |                                                       |                                                             |                                                                     |
|--------------------|-------------------------------------------------------|-------------------------------------------------------------|---------------------------------------------------------------------|
| MEF                |                                                       |                                                             |                                                                     |
| Cell Viability (%) |                                                       |                                                             |                                                                     |
| Days post seeding  | <i>Mcl-1<sup>fl/fl</sup></i> Rosa-CreER <sup>T2</sup> | <i>Mcl-1<sup>fl/fl</sup></i> Rosa-CreER <sup>T2</sup> + TAM | <i>Mcl-1<sup>fl/fl</sup></i> Rosa-CreER <sup>T2</sup> + TAM + MCL-1 |
| 0                  | 93.5 ± 0.7                                            | 96.5 ± 2.1                                                  | 99.0 ± 0                                                            |
| 1                  | 94.5 ± 3.5                                            | 97.5 ± 0.7                                                  | 97.0 ± 1.4                                                          |
| 2                  | 95.0 ± 0                                              | 94.5 ± 0.7                                                  | 96.0 ± 1.4                                                          |
| 3                  | 93.0 ± 1.4                                            | 96.5 ± 0.7                                                  | 97.5 ± 0.7                                                          |

  

| C                  |                                                             |                                                                                       |                                                                                    |
|--------------------|-------------------------------------------------------------|---------------------------------------------------------------------------------------|------------------------------------------------------------------------------------|
| MEF                |                                                             |                                                                                       |                                                                                    |
| Cell Viability (%) |                                                             |                                                                                       |                                                                                    |
| Days post seeding  | <i>Mcl-1<sup>fl/fl</sup></i> Rosa-CreER <sup>T2</sup> + TAM | <i>Mcl-1<sup>fl/fl</sup></i> Rosa-CreER <sup>T2</sup> + TAM + MCL-1 <sup>Matrix</sup> | <i>Mcl-1<sup>fl/fl</sup></i> Rosa-CreER <sup>T2</sup> + TAM + MCL-1 <sup>OMM</sup> |
| 0                  | 94.5 ± 0.7                                                  | 92.5 ± 0.7                                                                            | 97.0 ± 2.8                                                                         |
| 1                  | 97.5 ± 0.7                                                  | 94.0 ± 0                                                                              | 96.0 ± 0                                                                           |
| 2                  | 95.0 ± 1.4                                                  | 94.0 ± 1.4                                                                            | 97.5 ± 0.7                                                                         |
| 3                  | 96.0 ± 1.4                                                  | 95.0 ± 2.8                                                                            | 97.0 ± 1.4                                                                         |

  

| D                                             |                    | E                                             |                    | F                                                |                    |
|-----------------------------------------------|--------------------|-----------------------------------------------|--------------------|--------------------------------------------------|--------------------|
| <i>Bax<sup>-/-</sup>Bak<sup>-/-</sup></i> MEF |                    | <i>Bax<sup>-/-</sup>Bak<sup>-/-</sup></i> MEF |                    | <i>Bax<sup>-/-</sup>Bak<sup>-/-</sup></i> HCT116 |                    |
| S63845 (μM)                                   | Cell Viability (%) | AMG176 (μM)                                   | Cell Viability (%) | AMG176 (μM)                                      | Cell Viability (%) |
| 0                                             | 98.5 ± 0.7         | 0                                             | 94.5 ± 3.5         | 0                                                | 95.0 ± 2.8         |
| 5                                             | 97.5 ± 0.7         | 5                                             | 98.0 ± 2.8         | 5                                                | 94.5 ± 0.7         |
| 10                                            | 96.5 ± 0.7         | 10                                            | 96.5 ± 2.1         | 10                                               | 96.5 ± 2.1         |
| 15                                            | 97.5 ± 0.7         | 15                                            | 98.5 ± 2.1         | 15                                               | 97.5 ± 0.7         |
| 20                                            | 95.5 ± 0.7         | 20                                            | 95.0 ± 1.4         | 20                                               | 98.0 ± 2.8         |

  

| G                                             |                    | H                                                |                    | I                                                |                    |
|-----------------------------------------------|--------------------|--------------------------------------------------|--------------------|--------------------------------------------------|--------------------|
| <i>Bax<sup>-/-</sup>Bak<sup>-/-</sup></i> MEF |                    | <i>Bax<sup>-/-</sup>Bak<sup>-/-</sup></i> HCT116 |                    | <i>Bax<sup>-/-</sup>Bak<sup>-/-</sup></i> MV4;11 |                    |
| ABT199 (μM)                                   | Cell Viability (%) | S63845 (μM)                                      | Cell Viability (%) | S63845 (μM)                                      | Cell Viability (%) |
| 0                                             | 93.0 ± 1.4         | 0                                                | 98.0 ± 1.4         | 0                                                | 95.0 ± 4.2         |
| 5                                             | 92.5 ± 3.5         | 5                                                | 94.0 ± 2.8         | 5                                                | 92.5 ± 3.5         |
| 10                                            | 95.5 ± 0.7         | 10                                               | 95.0 ± 0           | 10                                               | 94.0 ± 1.4         |
| 15                                            | 97.0 ± 2.8         | 15                                               | 95.5 ± 2.1         | 15                                               | 99.5 ± 0.7         |
| 20                                            | 95.0 ± 2.8         | 20                                               | 93.0 ± 1.4         | 20                                               | 96.5 ± 4.9         |

  

| J           |                    | K                              |                    | L                                             |                    |
|-------------|--------------------|--------------------------------|--------------------|-----------------------------------------------|--------------------|
| WT MEF      |                    | <i>Mcl-1<sup>-/-</sup></i> MEF |                    | <i>Bax<sup>-/-</sup>Bak<sup>-/-</sup></i> MEF |                    |
| S63845 (μM) | Cell Viability (%) | S63845 (μM)                    | Cell Viability (%) | Days post seeding                             | Cell Viability (%) |
| 0           | 97.5 ± 0.7         | 0                              | 98.0 ± 1.4         | 0                                             | 95.5 ± 4.2         |
| 1           | 97.5 ± 2.1         | 1                              | 97.5 ± 0.7         | 1                                             | 95.0 ± 1.4         |
| 2           | 96.5 ± 0.7         | 2                              | 95.5 ± 0.7         | 2                                             | 94.0 ± 0.0         |
| 5           | 93.5 ± 0.7         | 5                              | 97.5 ± 0.7         | 3                                             | 96.5 ± 2.1         |
| 10          | 89.0 ± 1.4         | 10                             | 95.5 ± 0.7         |                                               |                    |

  

| M                                                                |                    | N                                             |                    |
|------------------------------------------------------------------|--------------------|-----------------------------------------------|--------------------|
| <i>Bax<sup>-/-</sup>Bak<sup>-/-</sup>Mcl-1<sup>-/-</sup></i> MEF |                    | <i>Bax<sup>-/-</sup>Bak<sup>-/-</sup></i> MEF |                    |
| Days post seeding                                                | Cell Viability (%) | Treatment                                     | Cell Viability (%) |
| 0                                                                | 96.5 ± 0.7         | Vehicle                                       | 96.5 ± 2.5         |
| 1                                                                | 96.5 ± 3.5         | S63845 (10 μM)                                | 96.5 ± 0.6         |
| 2                                                                | 94.0 ± 1.4         | Vincristine (10 nM)                           | 96.5 ± 0.7         |
| 3                                                                | 95.5 ± 0.7         | Co-treatment                                  | 94.0 ± 2.5         |

**Figure S2, Related to Figures 1 and 4D. Viability of Cell Lines with Discrete Genetic Deletions and in Response to Drug Treatments.**

(A-N) Percent viability was measured by trypan blue staining and cell count of (A) wild-type and *Mcl-1*<sup>-/-</sup> MEFs at days 0-3 post seeding, (B) *Mcl-1*<sup>fl/fl</sup>Rosa-ERCre<sup>T2</sup> MEFs, tamoxifen-treated *Mcl-1*<sup>fl/fl</sup>Rosa-ERCre<sup>T2</sup> MEFs, and tamoxifen-treated *Mcl-1*<sup>fl/fl</sup>Rosa-ERCre<sup>T2</sup> MEFs reconstituted with MCL-1 at days 0-3 post seeding, (C) tamoxifen-treated *Mcl-1*<sup>fl/fl</sup>Rosa-ERCre<sup>T2</sup> MEFs and those reconstituted with either MCL-1<sup>OMM</sup> or MCL-1<sup>Matrix</sup> at days 0-3 post seeding, (D) *Bax*<sup>-/-</sup>*Bak*<sup>-/-</sup> MEFs treated with S63845 at the indicated doses for 72 hours, (E) *Bax*<sup>-/-</sup>*Bak*<sup>-/-</sup> MEFs treated with AMG176 at the indicated doses for 72 hours, (F) *Bax*<sup>-/-</sup>*Bak*<sup>-/-</sup> HCT116 cells treated with AMG176 at the indicated doses for 72 hours, (G) *Bax*<sup>-/-</sup>*Bak*<sup>-/-</sup> MEFs treated with ABT-199 (Venetoclax) at the indicated doses for 72 hours, (H) *Bax*<sup>-/-</sup>*Bak*<sup>-/-</sup> HCT116 cells treated with S63845 at the indicated doses for 72 hours, (I) *Bax*<sup>-/-</sup>*Bak*<sup>-/-</sup> MV4;11 leukemia cells treated with S63845 at the indicated doses for 96 hours, (J) wild-type MEFs treated with S63845 at the indicated doses for 72 hours, (K) *Mcl-1*<sup>-/-</sup> MEFs treated with S63845 at the indicated doses for 72 hours, (L) *Bax*<sup>-/-</sup>*Bak*<sup>-/-</sup> MEFs at days 0-3 post seeding, (M) *Mcl-1*<sup>-/-</sup>*Bax*<sup>-/-</sup>*Bak*<sup>-/-</sup> (TKO) MEFs at days 0-3 post seeding, and (N) *Bax*<sup>-/-</sup>*Bak*<sup>-/-</sup> MEFs treated with vehicle (0.5% DMSO), vincristine, S63845, or the combination at the indicated doses for 16 hours. Data are mean ± S.D. for experiments performed in technical duplicate and conducted twice using independent preparations of cells and drug treatments, where indicated, with similar results.

A

| Drug                   | Mechanism of Action                  | Correlation |
|------------------------|--------------------------------------|-------------|
| BRD-K70511574          | Plk1 inhibitor                       | 0.782       |
| nakiterposin           | Impairs spindle assembly             | 0.761       |
| tivantinib             | RTK inhibitor (cMet); Anti-mitotic   | 0.759       |
| FQI-1                  | Anti-proliferative/Anti-mitotic      | 0.755       |
| ceranib-2              | Ceramidase inhibitor                 | 0.741       |
| FQI-2                  | Anti-proliferative/Anti-mitotic      | 0.741       |
| parbendazole           | Anti-helminthic/Anti-mitotic         | 0.731       |
| triazolothiadiazine    | Anti-mitotic                         | 0.726       |
| GSK461364              | Plk1 inhibitor                       | 0.712       |
| rigoserib              | Ras inhibitor; Anti-mitotic          | 0.709       |
| YK-4-279               | ETV1 inhibitor; Anti-mitotic         | 0.709       |
| GW-843682X             | PLK1 inhibitor                       | 0.689       |
| evodiamine             | Anti-inflammatory                    | 0.688       |
| pacitaxel              | Anti-mitotic                         | 0.68        |
| NVP-231                | Ceramide kinase inhibitor            | 0.679       |
| narciclasine           | Anti-inflammatory                    | 0.667       |
| LY2183240              | FAAH inhibitor                       | 0.667       |
| KX2-391                | Src-kinase inhibitor; Anti-mitotic   | 0.661       |
| CHM-1                  | Anti-mitotic                         | 0.656       |
| SB-225002              | CXCR2 antagonist/Anti-mitotic        | 0.653       |
| teniposide             | Topoisomerase II inhibitor           | 0.652       |
| docetaxel              | Anti-mitotic                         | 0.648       |
| BI-2536                | Plk1 inhibitor                       | 0.643       |
| SB-743921              | Eg5 inhibitor                        | 0.637       |
| tipifarnib             | Farnesyltransferase inhibitor        | 0.635       |
| BRD9876;MK-1775        | Anti-mitotic/Wee1 inhibitor          | 0.633       |
| gemcitabine            | DNA synthesis inhibitor              | 0.628       |
| cytarabine             | DNA polymerase inhibitor             | 0.626       |
| PHA-793887             | Pan-CDK inhibitor                    | 0.625       |
| PL-DI                  | ROS inducer                          | 0.624       |
| etoposide              | Topoisomerase II inhibitor           | 0.621       |
| docetaxel;tanespimycin | Anti-mitotic/HSP90 inhibitor         | 0.621       |
| KPT-185                | XPO1 inhibitor/Anti-proliferative    | 0.621       |
| clofarabine            | DNA synthesis inhibitor              | 0.62        |
| vorinostat             | HDAC inhibitor/Anti-proliferative    | 0.619       |
| SR-II-138A             | Translation inhibitor                | 0.618       |
| doxorubicin            | Topoisomerase II inhibitor           | 0.613       |
| pevonedistat           | Nedd8 activating enzyme inhibitor    | 0.612       |
| carboplatin;etoposide  | Topoisomerase II inhibitor           | 0.609       |
| topotecan              | Topoisomerase II inhibitor           | 0.608       |
| alisertib              | Aurora kinase A/B inhibitor          | 0.608       |
| CD-437                 | Retinoic acid gamma receptor agonist | 0.603       |
| BRD-K34222889          | ROS inducer                          | 0.601       |
| PF-03758309            | PAK4 inhibitor/Anti-proliferative    | 0.598       |
| PF-184                 | IKK2 inhibitor                       | 0.597       |
| MK-1775                | Wee1 inhibitor                       | 0.596       |

B

| Drug                | Mechanism of Action                         | Correlation |
|---------------------|---------------------------------------------|-------------|
| bitopertin          | Glycine reuptake inhibitor                  | 0.47499     |
| brivaracetam        | Anti-convulsant                             | 0.44143     |
| KG-5                | B-Raf inhibitor                             | 0.46253     |
| pardoprunox         | Dopamine receptor agonist                   | 0.43394     |
| PHA-793887          | Pan-CDK inhibitor                           | 0.41639     |
| methiazole          | Anti-helminthic/Anti-mitotic                | 0.41304     |
| benzethonium        | Anti-septic/Anti-bacterial                  | 0.40997     |
| ARQ-621             | Kinesin inhibitor                           | 0.43467     |
| SB-743921           | Eg5 inhibitor                               | 0.40812     |
| SB-225002           | CXCR2 antagonist/Anti-mitotic               | 0.40787     |
| mebendazole         | Anti-helminthic/Anti-mitotic                | 0.40187     |
| litronesib          | Eg5 inhibitor                               | 0.40573     |
| tivantinib          | RTK inhibitor (cMet); Anti-mitotic          | 0.39886     |
| D-64131             | Anti-mitotic                                | 0.39453     |
| octenidine          | Anti-septic                                 | 0.39552     |
| uproserib           | Akt inhibitor                               | 0.39471     |
| OSI-930             | c-Kit inhibitor                             | 0.4036      |
| BMS-754807          | IGF-1R inhibitor                            | 0.39057     |
| xanomeline          | Acetylcholine receptor agonist              | 0.38884     |
| KF-38789            | P-selectin-mediated-cell adhesion inhibitor | 0.38679     |
| tozasertib          | Pan-Aurora kinase inhibitor                 | 0.38494     |
| SNS-314             | Pan-Aurora kinase inhibitor                 | 0.3859      |
| PF-03758309         | PAK4 inhibitor/Anti-proliferative           | 0.38372     |
| oxiracetam          | Central nervous system stimulant            | 0.3826      |
| BML-284             | Wnt agonist                                 | 0.40532     |
| alexidine           | Anti-microbial                              | 0.38139     |
| 10-deacetylbaicatin | Anti-mitotic                                | 0.3883      |
| YK-4-279            | ETV1 inhibitor; Anti-mitotic                | 0.40276     |
| CUDC-101            | HDAC inhibitor                              | 0.37637     |
| CMPD-1              | MK2 inhibitor/Anti-mitotic                  | 0.37514     |
| PHA-680632          | Pan-Aurora kinase inhibitor                 | 0.37329     |
| thiostrepton        | Anti-microbial                              | 0.37318     |
| crizotinib          | ALK and ROS1 inhibitor                      | 0.37154     |
| MLN-8054            | Aurora kinase A inhibitor                   | 0.3784      |
| alisertib           | Aurora kinase A/B inhibitor                 | 0.37259     |
| AZ3146              | MPS1 kinase inhibitor/Anti-mitotic          | 0.36896     |
| ispinesib           | KSP kinase inhibitor/Anti-mitotic           | 0.36949     |
| oxyphenyclimine     | Muscarinic receptor antagonist              | 0.37434     |
| entinostat          | HDAC inhibitor                              | 0.36794     |
| NVP-231             | Ceramide kinase inhibitor                   | 0.39213     |
| CCT129202           | Aurora kinase A inhibitor                   | 0.36756     |
| GW-843682X          | PLK1 inhibitor                              | 0.36674     |
| 4SC-202             | HDAC inhibitor                              | 0.38828     |
| CYC116              | Aurora kinase A/B inhibitor                 | 0.3642      |
| resminostat         | HDAC inhibitor                              | 0.36327     |
| TH-302              | Hypoxia activated prodrug                   | 0.36243     |
| vinflunine          | Anti-mitotic                                | 0.3844      |

C

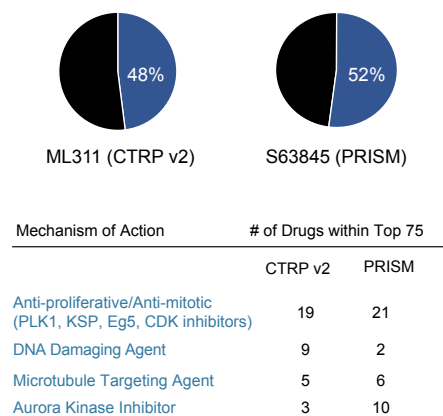

D

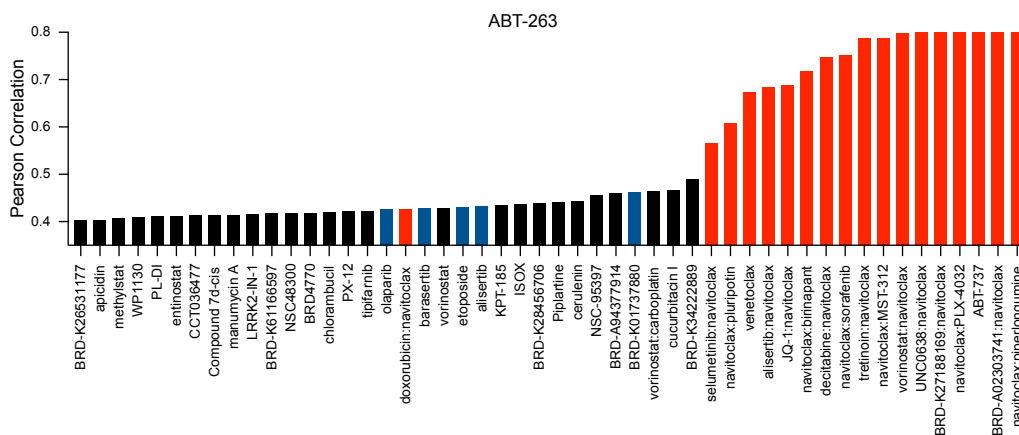

E

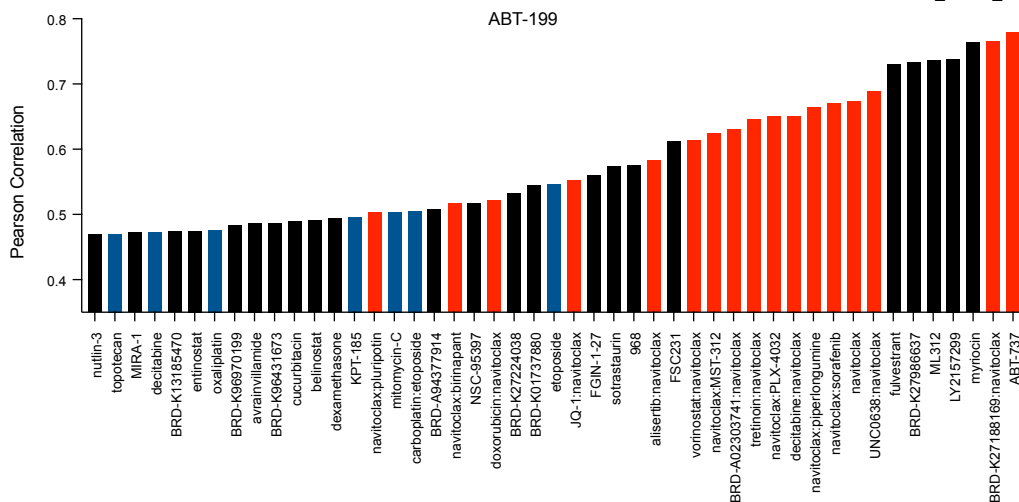

**Figure S3, Related to Figure 2. Ranked Listings of Drugs whose Pharmacologic Profiles Correlate with Treatment by Inhibitors of Select BCL-2 Family Anti-Apoptotic Proteins.**

(A) Ranked list of drugs that correlate most with ML311 pharmacologic activity across cancer cell lines in the CTRP v2 dataset (Fig 2D). The targets and/or mechanisms of action for each drug, and the correlation coefficients, are shown. Drug names colored in blue are common to those identified for the distinct S63845 analysis in B.

(B) Ranked list of drugs within the Drug Repurposing Hub dataset (Broad Institute) that correlate most with S63845 pharmacologic activity across the CCLE. The targets and/or mechanisms of action for each drug, and the correlation coefficients, are shown. Drug names colored in blue are common to those identified for the distinct ML311 analysis in A.

(C) Fifty percent of the top 75 drugs that correlate with ML311 or S63845 activity across the CCLE harbor common mechanisms of action as anti-proliferative/anti-mitotic drugs, DNA damaging agents, microtubule targeting agents, or aurora kinase inhibitors.

(D-E) Treatment with Navitoclax (ABT-263; BCL-2/BCL-X<sub>L</sub> inhibitor) (D) or Venetoclax (ABT-199; selective BCL-2 inhibitor) (E) correlates with the pharmacologic profiles of apoptosis-inducing drugs or their respective drug combinations, as demonstrated by analyzing the sensitivity data for 500 drugs across the CCLE (CTRP v2, Broad Institute). Molecular modulators of the apoptotic pathway are colored red, and anti-proliferative and anti-mitotic compounds are colored blue.

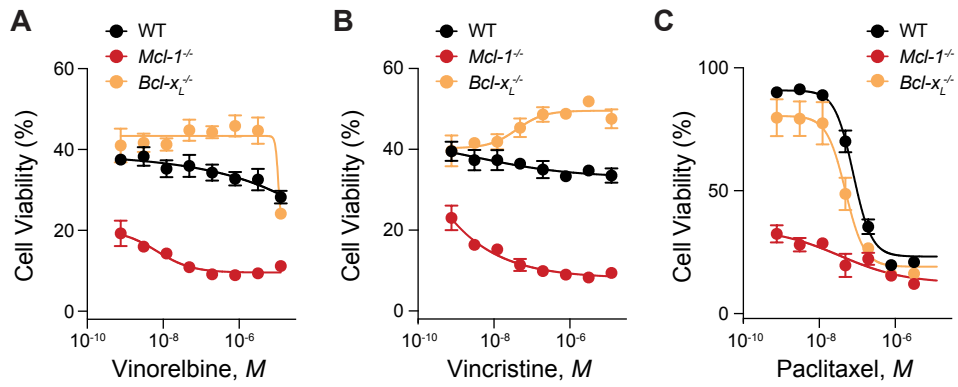



**Figure S4, Related to Figure 3. Relative Susceptibility of Wild-Type, *Mcl-1*<sup>-/-</sup>, and *Bcl-x<sub>L</sub>*<sup>-/-</sup> MEFs to Treatment with Vinorelbine, Vincristine, or Paclitaxel.**

(A-C) Deletion of *Mcl-1*<sup>-/-</sup> but not *Bcl-x<sub>L</sub>*<sup>-/-</sup> sensitizes MEFs to the microtubule targeting agents (MTAs) vinorelbine (A), vincristine (B), and paclitaxel (C). Data are mean ± S.D. for experiments performed in technical triplicate and conducted twice using independent preparations of cells and MTAs with similar results.

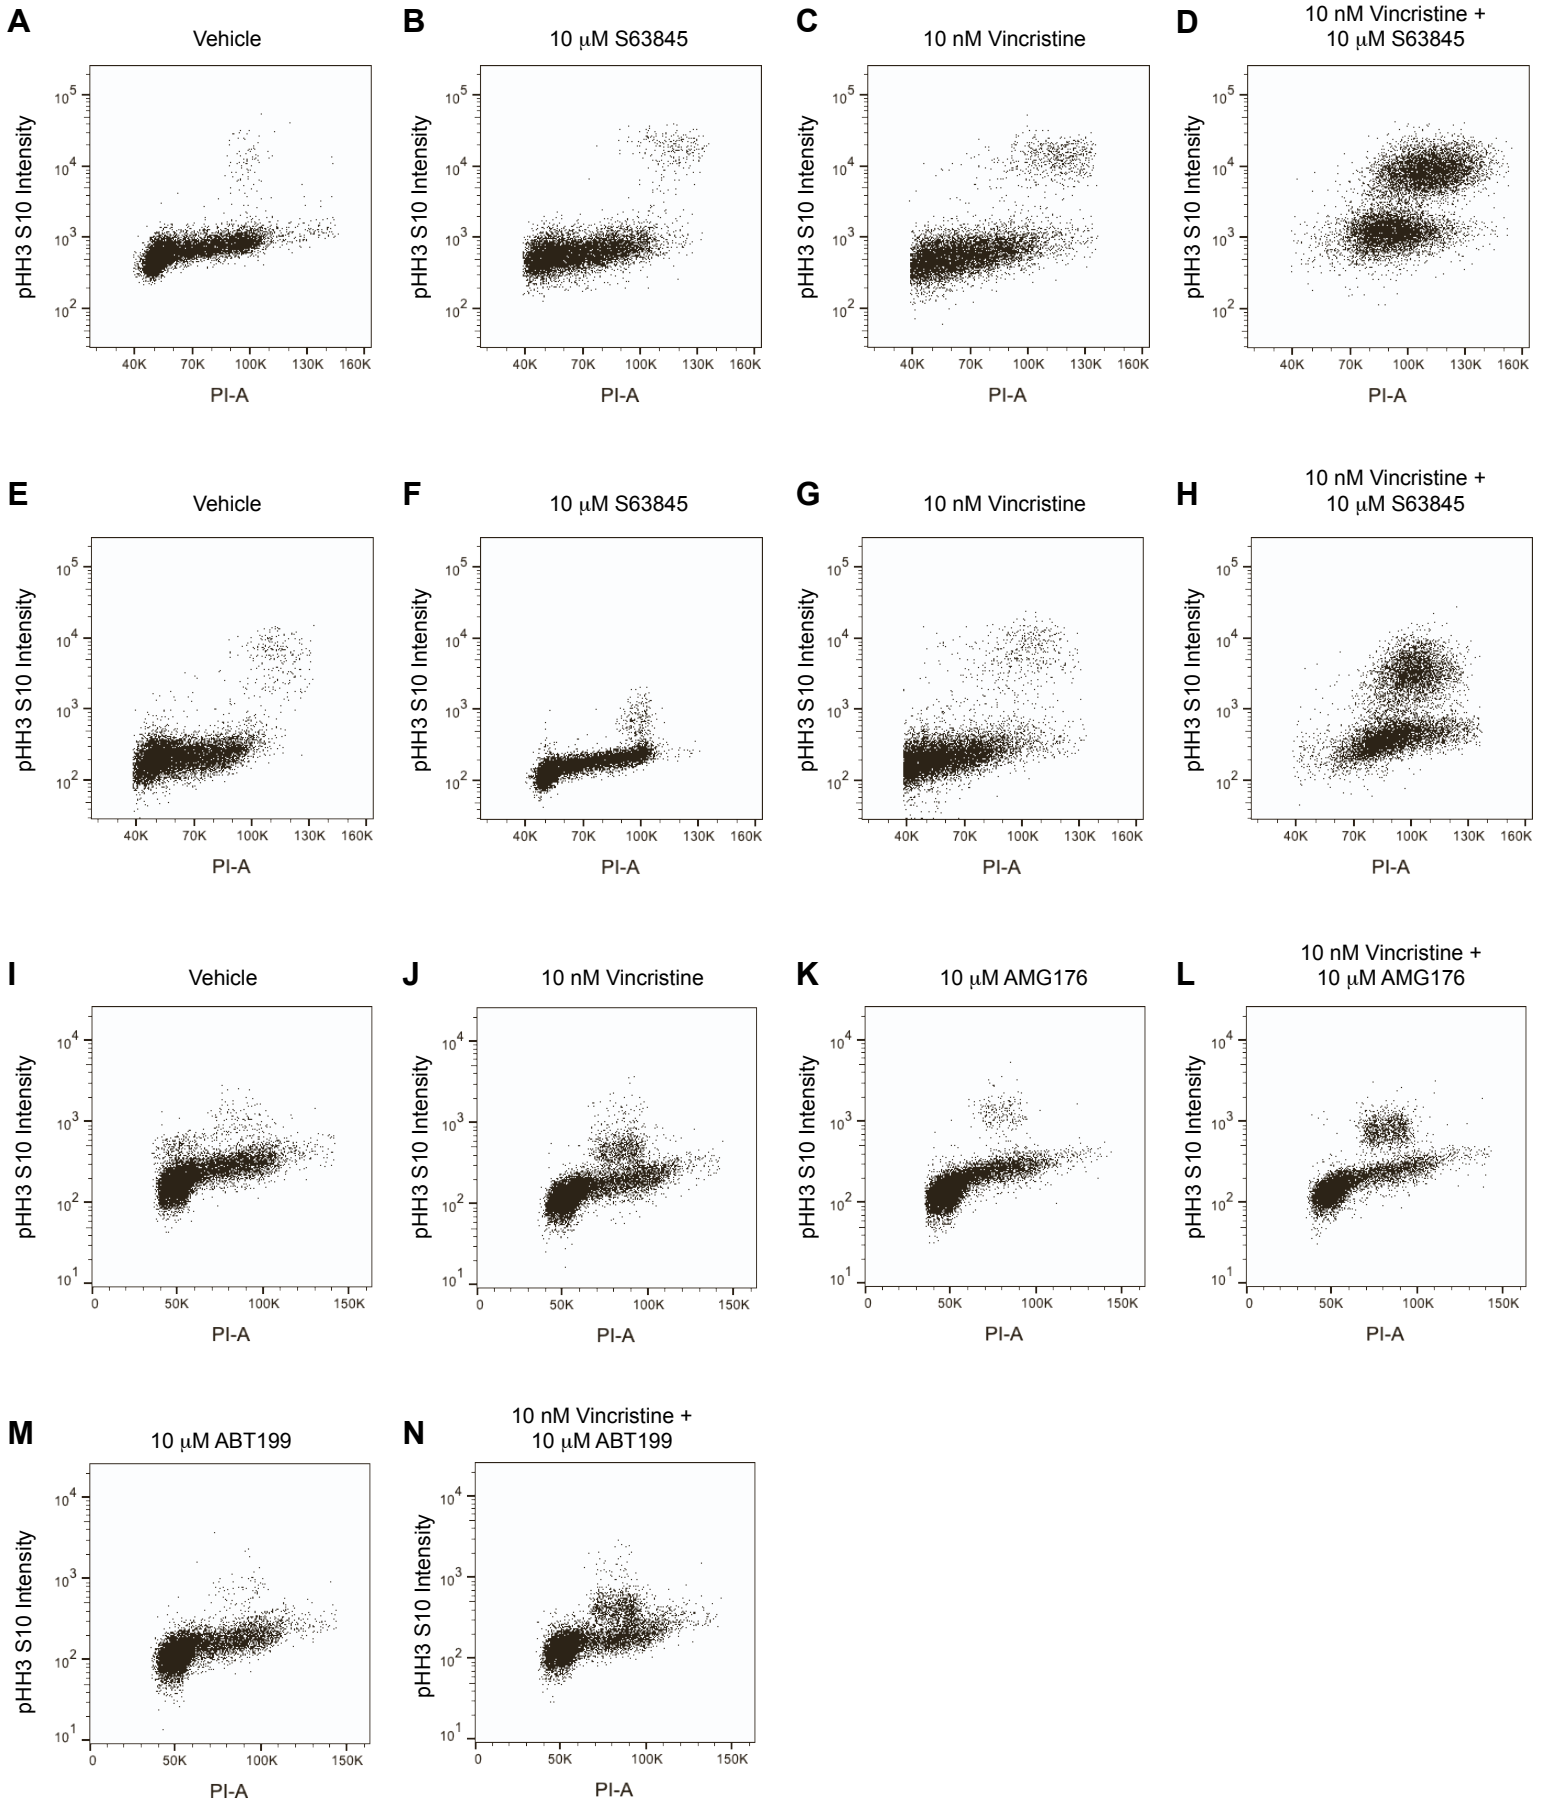

**Figure S5, Related to Figures 4 and S6. FACS-based Cell Cycle Analyses of Drug-treated WT MEF, *Bax*<sup>-/-</sup>*Bak*<sup>-/-</sup> MEF, and *Bax*<sup>-/-</sup>*Bak*<sup>-/-</sup> HCT116 Cells.**

(A-D) Representative cell cycle scatter plots showing phospho-histone H3 (pHH3) S10 vs. propidium iodide (PI) staining intensities in WT MEFs treated with vehicle (0.1% DMSO) (A), 10  $\mu$ M S63845 (B), 10 nM vincristine (C), or the combination of 10  $\mu$ M S63845 and 10 nM vincristine (D). Cells in mitosis show higher (pHH3) S10 intensity and higher DNA content, as assessed by PI staining. Plots were generated after gating on singlet cells only.

(E-H) Representative cell cycle scatter plots showing phospho-histone H3 (pHH3) S10 vs. propidium iodide (PI) staining intensities in *Bax*<sup>-/-</sup>*Bak*<sup>-/-</sup> MEFs treated with vehicle (0.1% DMSO) (E), 10  $\mu$ M S63845 (F), 10 nM vincristine (G), or the combination of 10  $\mu$ M S63845 and 10 nM vincristine (H). Cells in mitosis show higher (pHH3) S10 intensity and higher DNA content, as assessed by PI staining. Plots were generated after gating on singlet cells only.

(I-N) Representative cell cycle scatter plots showing phospho-histone H3 (pHH3) S10 vs. propidium iodide (PI) staining intensities in *Bax*<sup>-/-</sup>*Bak*<sup>-/-</sup> HCT116 cells treated with vehicle (0.1% DMSO) (I), 10 nM vincristine (J), 10  $\mu$ M AMG176 (K), the combination of 10  $\mu$ M AMG176 and 10 nM vincristine (L), 10  $\mu$ M ABT-199 (Venetoclax) (M), the combination of 10  $\mu$ M ABT-199 (Venetoclax) and 10 nM vincristine (N). Cells in mitosis show higher (pHH3) S10 intensity and higher DNA content, as assessed by PI staining. Plots were generated after gating on singlet cells only.

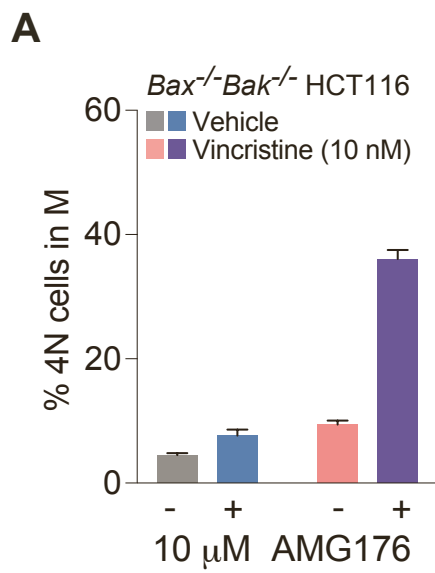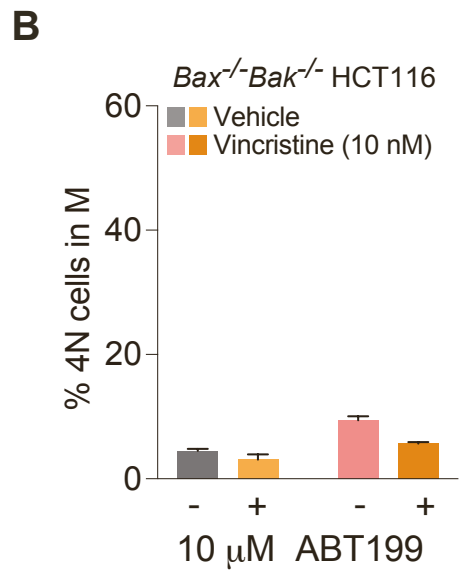

**Figure S6, Related to Figure 4. Cell Cycle Effects of AMG176 and Venetoclax Treatment of *Bax*<sup>-/-</sup>*Bak*<sup>-/-</sup> HCT116 Cells.**

(A-B) Combination treatment with AMG176 and vincristine for 16 hours caused mitotic arrest in *Bax*<sup>-/-</sup>*Bak*<sup>-/-</sup> HCT116 cells (A), whereas combination treatment with ABT-199 (Venetoclax) and vincristine had no such effect (B). Data are mean ± S.D. for experiments performed in technical duplicate and conducted twice using independent preparations of cells and drugs with similar results.

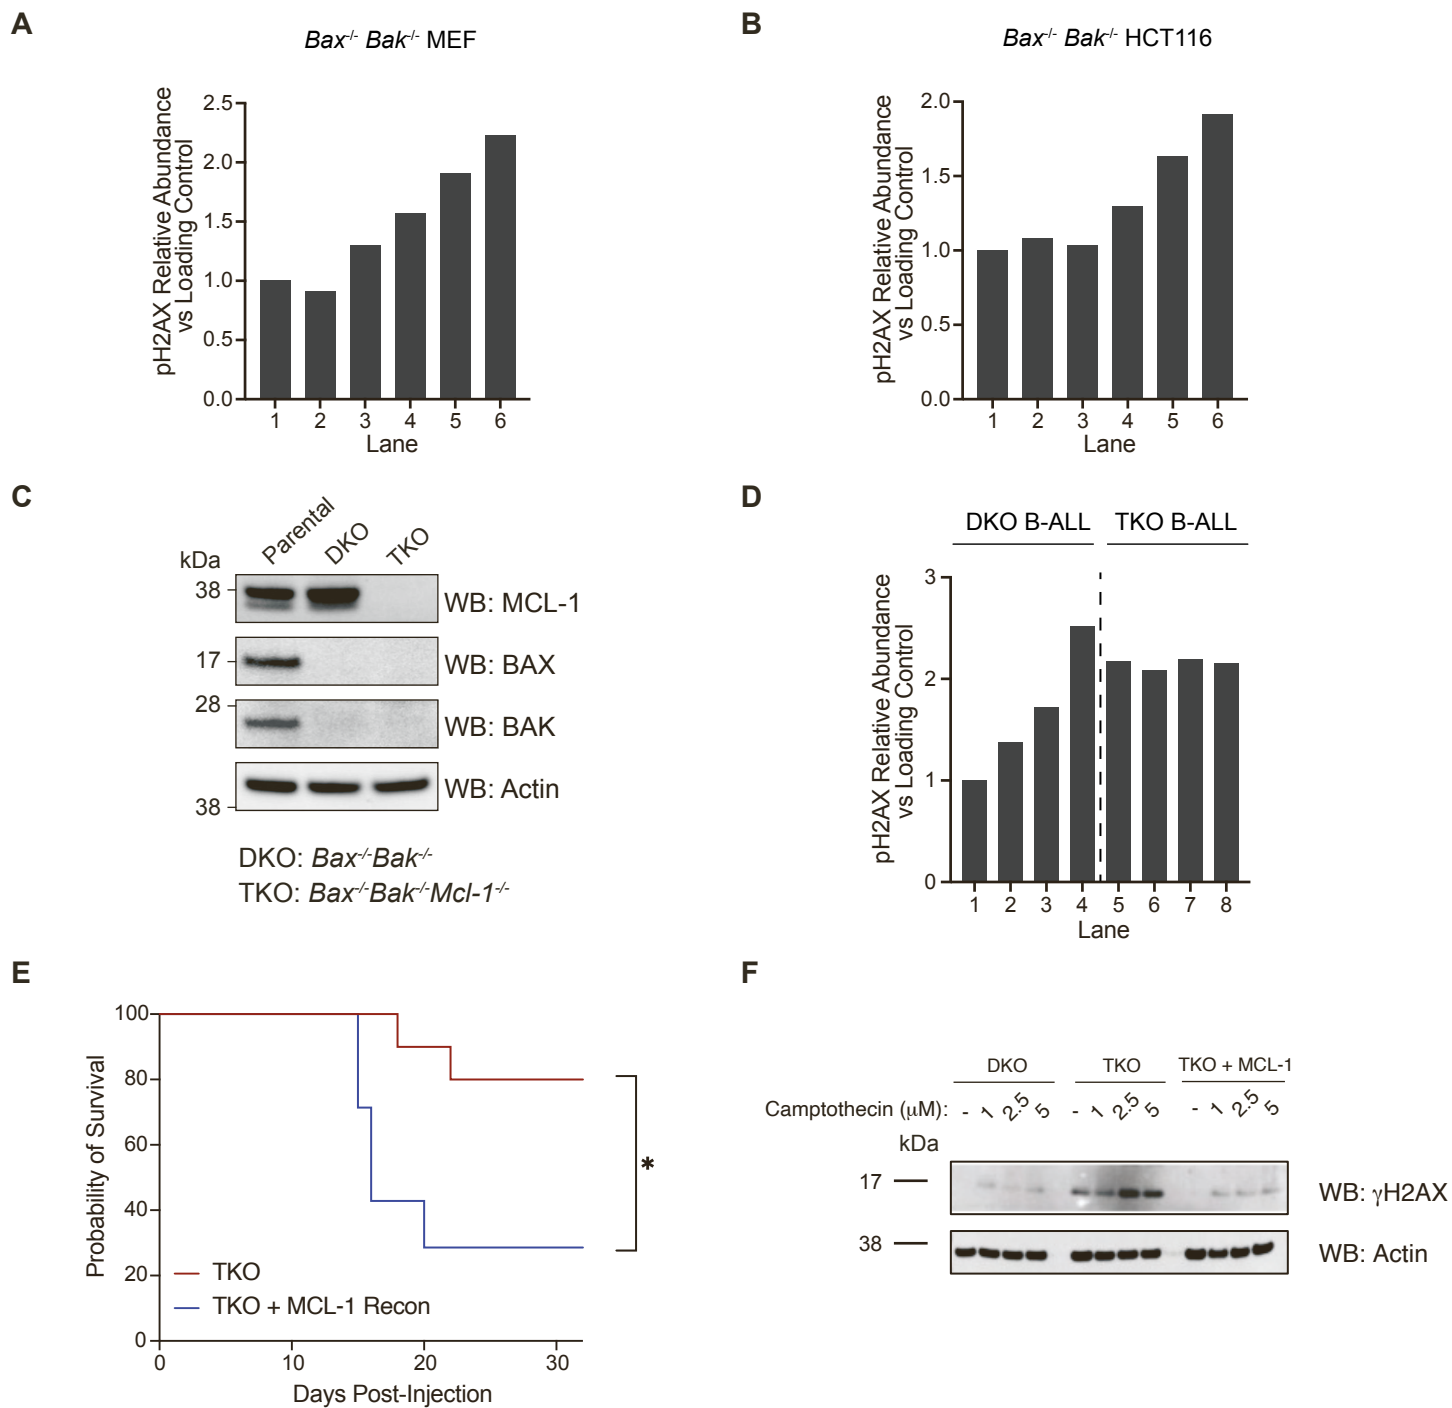

**Figure S7, Related to Figures 5 and 6. Quantitation of S63845-induced DNA Damage in DKO and TKO Cells, and Rescue of TKO Phenotype upon MCL-1 Reconstitution.**

(A-B) Quantitation of  $\gamma$ H2AX levels in response to S63845 treatment of *Bax*<sup>-/-</sup>*Bak*<sup>-/-</sup> MEFs (A) and *Bax*<sup>-/-</sup>*Bak*<sup>-/-</sup> HCT116 cells (B), as measured by densitometry of western blots (Figures 5G and 5H, respectively).

(C) Western analyses of MCL-1, BAX, BAK, and actin in parental, *Bax*<sup>-/-</sup>*Bak*<sup>-/-</sup> (DKO) and *Mcl-1*<sup>-/-</sup>*Bax*<sup>-/-</sup>*Bak*<sup>-/-</sup> (TKO) B-ALL cells.

(D) Quantitation of  $\gamma$ H2AX levels in response to S63845 treatment of *Bax*<sup>-/-</sup>*Bak*<sup>-/-</sup> (DKO) and *Mcl-1*<sup>-/-</sup>*Bax*<sup>-/-</sup>*Bak*<sup>-/-</sup> (TKO) B-ALL cells, as measured by densitometry of the western blot (Figures 5I).

(E) Reconstitution of TKO B-ALL cells with hMCL-1 restored the high engraftment rate of DKO cells as compared to TKO cells, as monitored for 33 days in mice administered 500,000 leukemic cells by tail vein (n=10 mice per arm; \*, p=0.013).

(F) The increased susceptibility of TKO B-ALL cells to DNA damage induced by 24 hour camptothecin treatment, relative to DKO B-ALL cells, is rescued by reconstitution of TKO B-ALL cells with MCL-1, as assessed by  $\gamma$ H2AX western analysis.

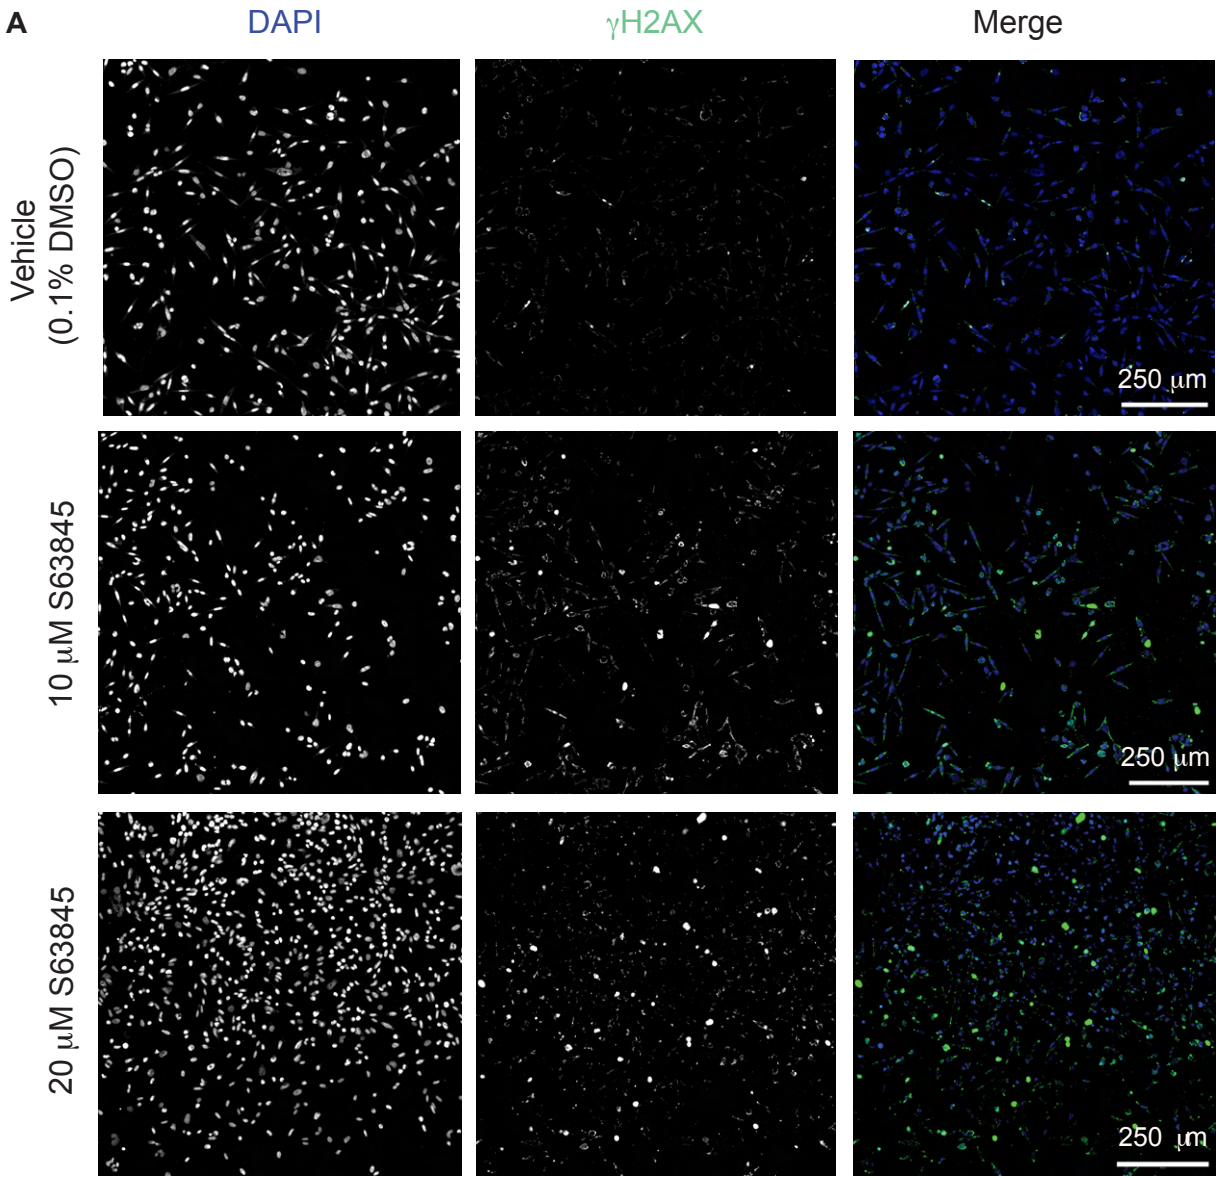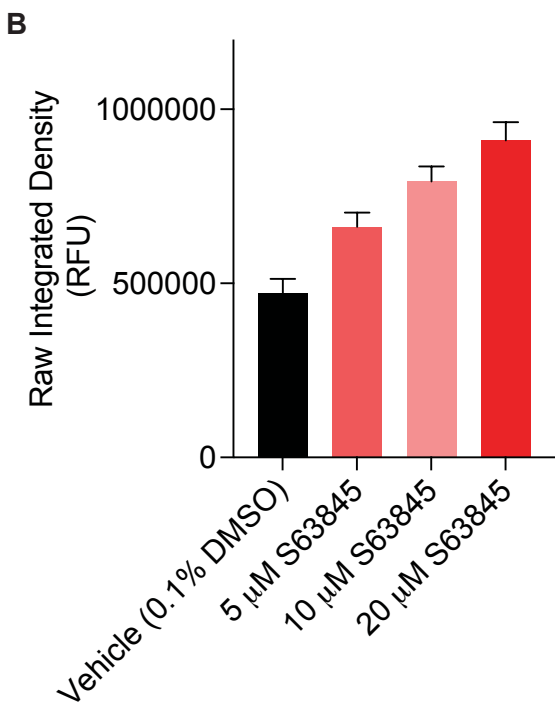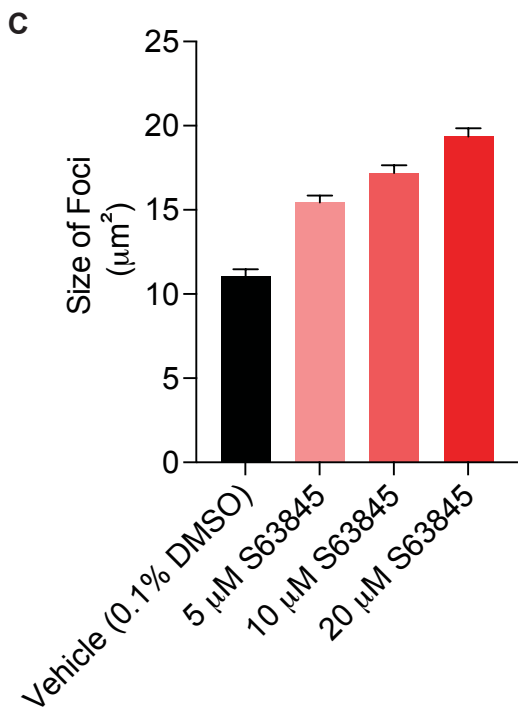



**Figure S8, Related to Figure 5. Detection and Quantitation of DNA Damage Nuclear Foci in S63845-treated Cells.**

(A) *Bax*<sup>-/-</sup>*Bak*<sup>-/-</sup> MEFs were treated with vehicle (top row) or the indicated doses of S63845 (middle and bottom row) and subjected to DAPI staining (left column), immunofluorescence detection of  $\gamma$ H2AX (middle column), and overlay of the microscopy images (right column).

(B-C) Raw integrated density (B) and the size of nuclear foci (C) were quantitated by ImageJ analysis. RFU, relative fluorescence units. Data are mean  $\pm$  S.E.M. for experiments performed in technical triplicate.

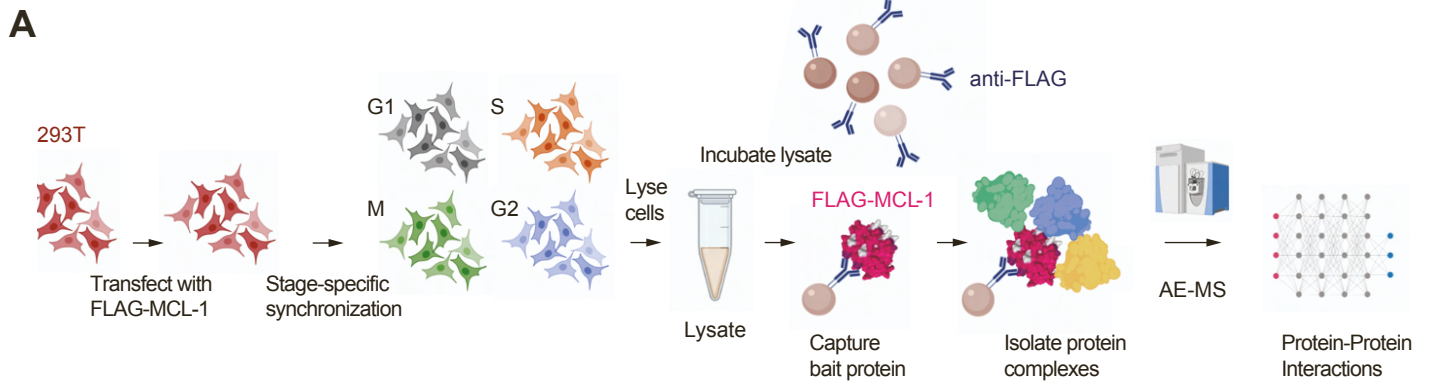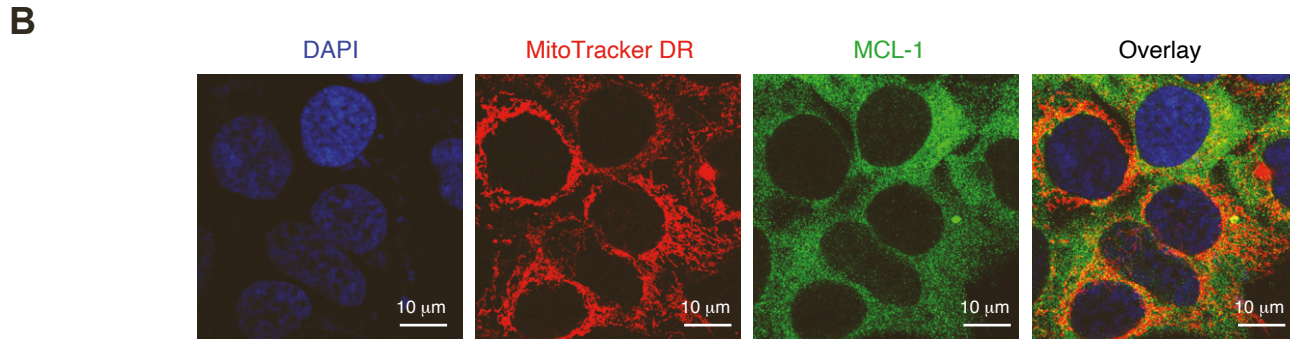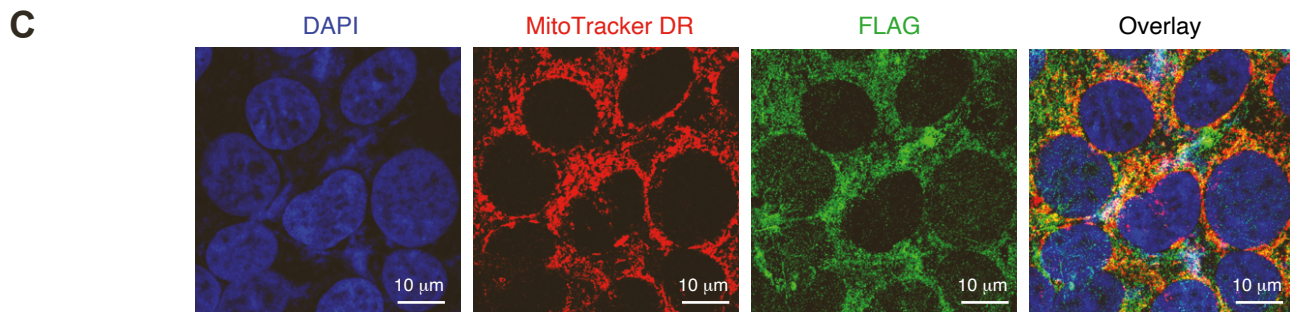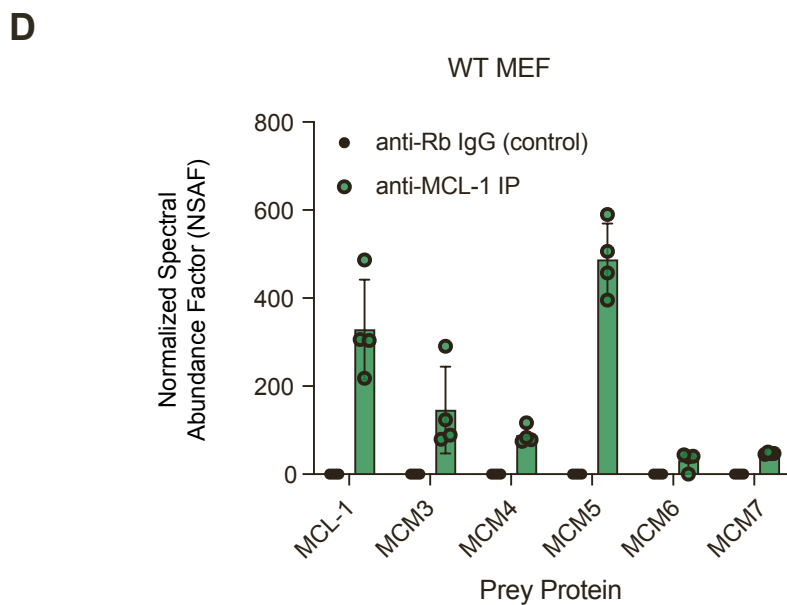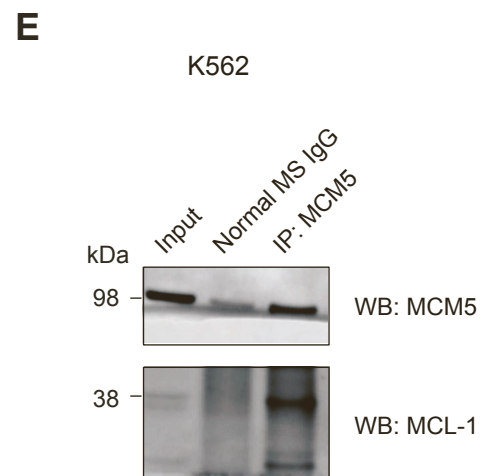

**Figure S9, Related to Figure 7. AE-MS Workflow, Immunolocalization of Endogenous and FLAG-tagged MCL-1 in Cells, and Validation of the Interaction Between MCL-1 and Members of the MCM Complex.**

(A) Affinity enrichment mass spectrometry (AE-MS) workflow for capture of FLAG-MCL-1 bound proteins in lysates from HEK 293T cells at each stage of the cell cycle.

(B-C) Immunofluorescence imaging of endogenous MCL-1 in untransfected 293T cells (B) and FLAG in FLAG-MCL-1 transfected 293T cells (C) (green). Cells were counterstained with the nuclear marker DAPI (blue) and the mitochondrial marker MitoTracker DR (red).

(D) Enrichment of MCM complex members in MCL-1 immunoprecipitates from wild-type MEF lysates, as detected by AP-MS using anti-MCL-1 (green) and control anti-rabbit IgG (black) antibodies. The normalized spectral abundance factor (NSAF) values for MCM complex members 3-7 are shown. Four biological replicates of the AP-MS experiments were performed.

(E) Co-immunoprecipitation of native MCL-1 and MCM5 from lysates of MCL-1 independent K562 cells using an MCL-1 antibody.

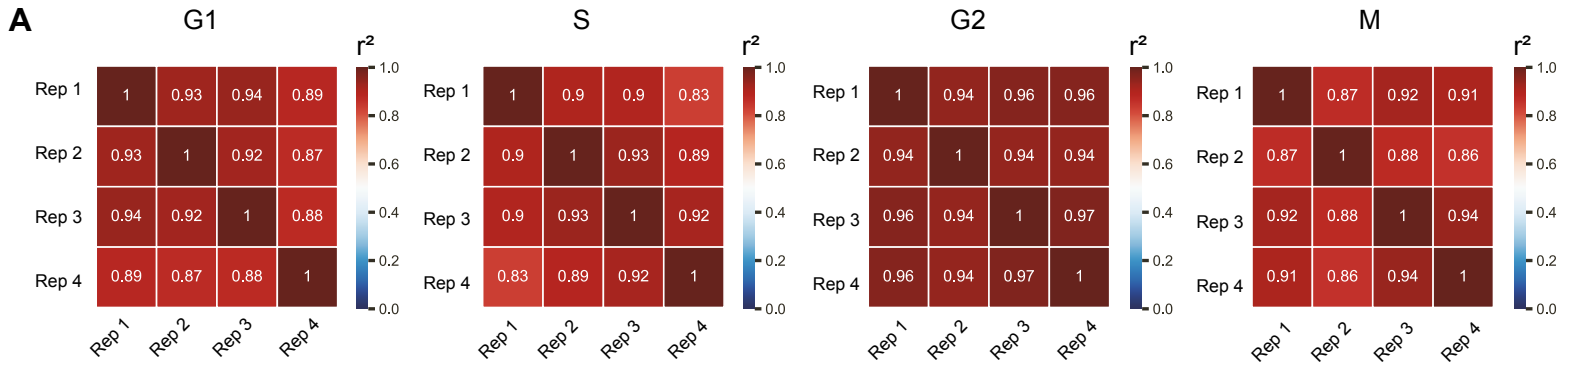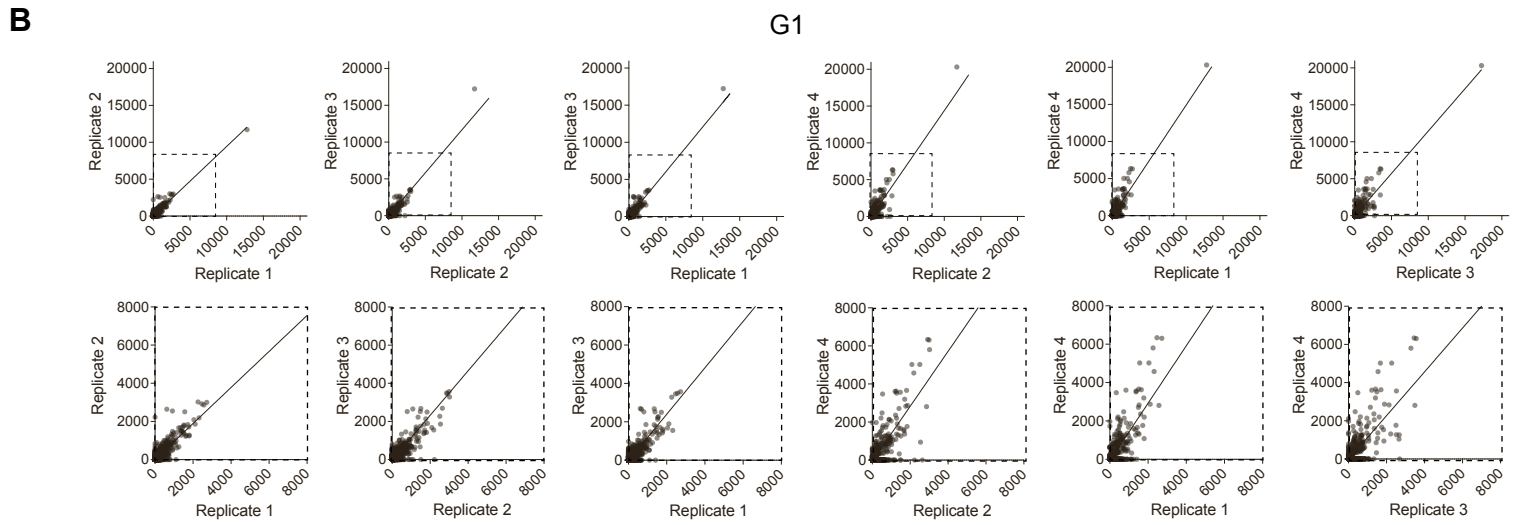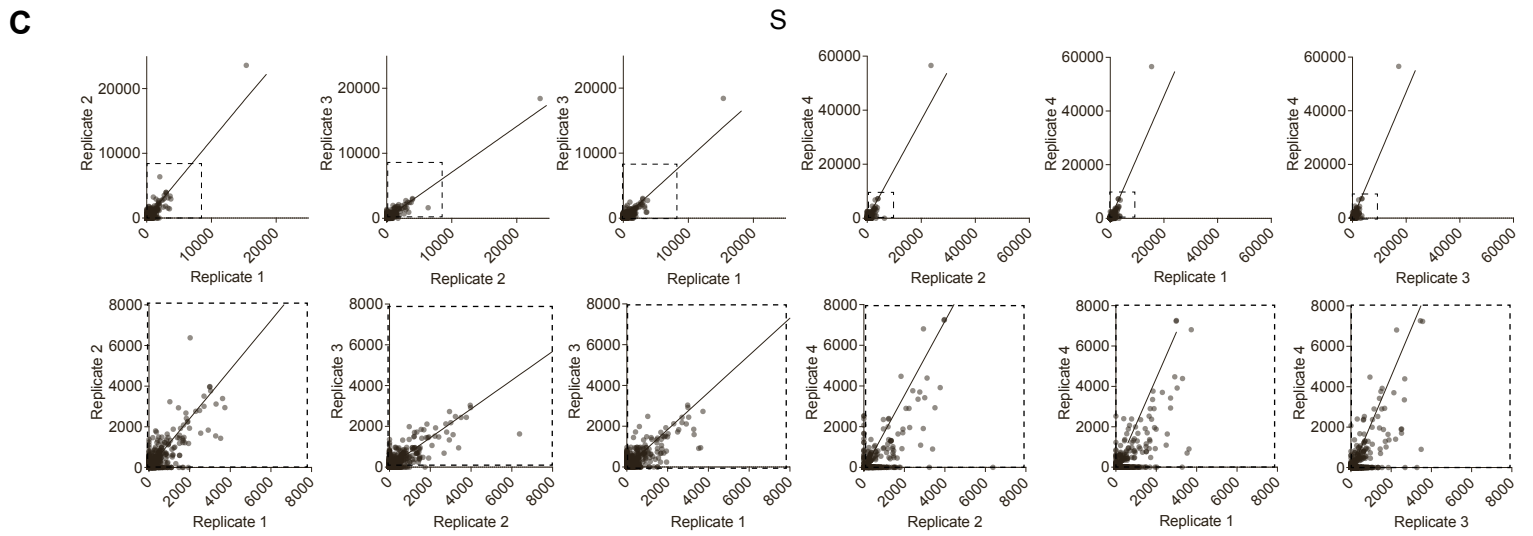

**D**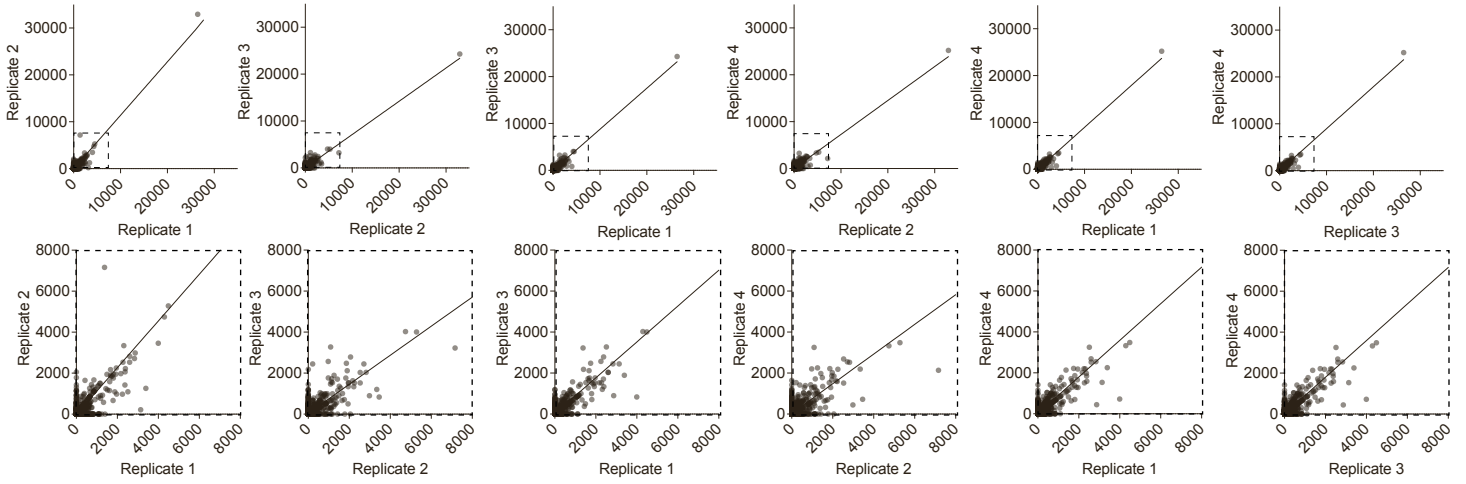**G2****E**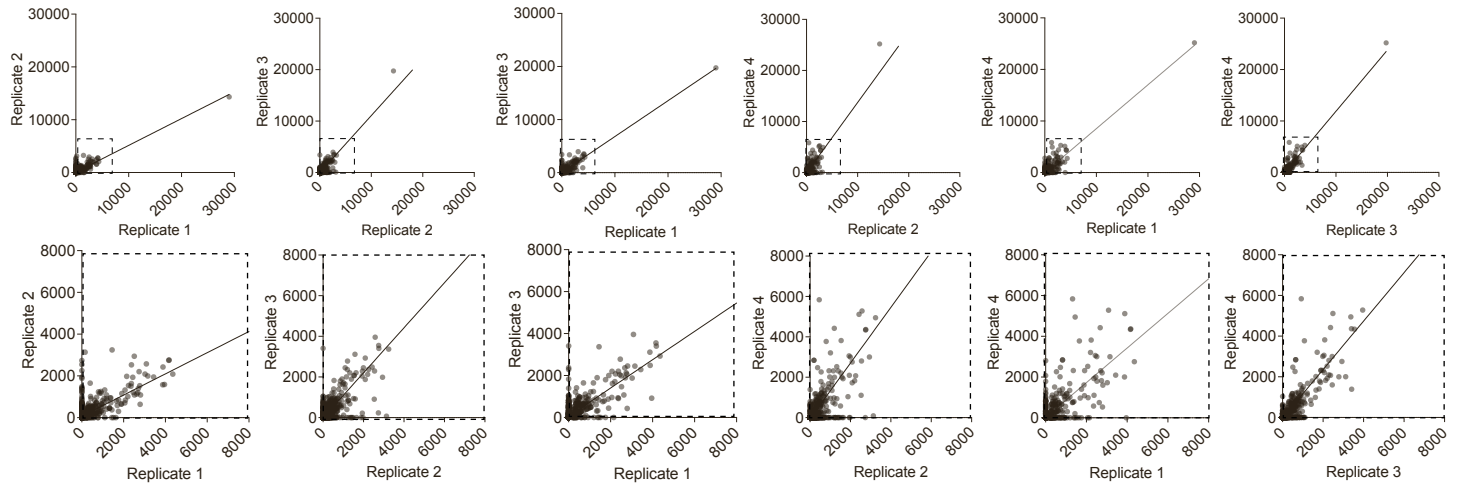**M**

**Figure S10, Related to Figure 7. Replicates of AE-MS Across Each Stage of the Cell Cycle.**

(A) Summary table of Pearson correlations for biological replicates (n=4) of the AE-MS analyses of anti-FLAG immunoprecipitates from lysates of FLAG-MCL-1 expressing HEK293T cells.

(B-E) Pairwise scatter plots of normalized spectral abundance factors (NSAFs) for the identified proteins among biological replicates performed at the G1 (B), S (C), G2 (D), and M (E) stages of the cell cycle. Dashed box portion of each plot is expanded below. For all plots, statistical significance of the correlation is  $p < 0.0001$ .

**A**

| Uniprot ID | Protein | Unique Peptides | Razor Peptides | G1 Phase Abundance | S Phase Abundance | G2 Phase Abundance | M Phase Abundance | G1 Phase Rank | S Phase Rank | G2 Phase Rank | M Phase Rank |
|------------|---------|-----------------|----------------|--------------------|-------------------|--------------------|-------------------|---------------|--------------|---------------|--------------|
| Q07820     | MCL-1   | 580             | 1980           | 12249.95           | 19496.75          | 29699.8            | 21674.2           | 1             | 1            | 1             | 1            |
| Q07812-2   | BAX     | 0               | 47             | 932.708            | 325.167           | 0                  | 2064.295          | 12            | 27           | N/A           | 11           |
| Q16611     | BAK     | 1               | 24             | 287.817            | 167.977           | 890.915            | 0                 | 88            | 65           | >200          | N/A          |
| P12004     | PCNA    | 65              | 0              | 470.5275           | 699.283           | 1089.822           | 402.6865          | 68            | 42           | 24            | 48           |
| P06493     | CDK1    | 0               | 165            | 1587.33            | 990.3695          | 2402.625           | 2576.835          | 6             | 49           | 2             | 4            |

**B**

**G1 Phase**

| Rank | CORUM Complex Term                                       | P-value     | Odds Ratio  | Combined Enrichment Score |
|------|----------------------------------------------------------|-------------|-------------|---------------------------|
| 1    | F1F0-ATP synthase (EC 3.6.3.14), mitochondrial (human)   | 0.005646299 | 20.34358974 | 105.3137806               |
| 2    | Emerin complex 52 (human)                                | 0.013075293 | 12.58857143 | 54.59702323               |
| 3    | ADAR1-CDK2 complex (human)                               | 0.015142488 | 131.4370861 | 550.7543436               |
| 4    | CDK2-CCNE1 complex (human)                               | 0.015142488 | 131.4370861 | 550.7543436               |
| 5    | Y14-Magoh complex (human)                                | 0.015142488 | 131.4370861 | 550.7543436               |
| 6    | ARD1-NATH complex (human)                                | 0.015142488 | 131.4370861 | 550.7543436               |
| 7    | Ubiquitin-protein-ligase (UBE2N, UBE2V2/MMS2) (human)    | 0.015142488 | 131.4370861 | 550.7543436               |
| 8    | CDK2-CCNA2 complex (human)                               | 0.015142488 | 131.4370861 | 550.7543436               |
| 9    | SMRT-SKIP-CBF1 complex (human)                           | 0.022628121 | 65.71523179 | 248.9662195               |
| 10   | PGAM5-KEAP1-NRF2 complex (human)                         | 0.022628121 | 65.71523179 | 248.9662195               |
| 11   | Emerin-actin-NMI complex (human)                         | 0.022628121 | 65.71523179 | 248.9662195               |
| 12   | RBP-Jkappa-RING1-KyoT2 complex (human)                   | 0.022628121 | 65.71523179 | 248.9662195               |
| 13   | CS-MAP3K7IP1-MAP3K7IP2 complex (human)                   | 0.022628121 | 65.71523179 | 248.9662195               |
| 14   | TRIKA2 protein kinase complex (TAK1, TAB1, TAB2) (human) | 0.022628121 | 65.71523179 | 248.9662195               |
| 15   | ARF-Mule complex (human)                                 | 0.022628121 | 65.71523179 | 248.9662195               |
| 16   | Ku antigen-NARG1 complex (human)                         | 0.022628121 | 65.71523179 | 248.9662195               |
| 17   | CASK-LIN7C-APBA1 complex (human)                         | 0.022628121 | 65.71523179 | 248.9662195               |
| 18   | p27-cyclinE-CDK2 complex (human)                         | 0.022628121 | 65.71523179 | 248.9662195               |
| 19   | CALM1-FKBP38-BCL2 complex (human)                        | 0.022628121 | 65.71523179 | 248.9662195               |
| 20   | CDC2-CCNA2-CDK2 complex (human)                          | 0.022628121 | 65.71523179 | 248.9662195               |

**S Phase**

| Rank | CORUM Complex Term                                | P-value     | Odds Ratio  | Combined Enrichment Score |
|------|---------------------------------------------------|-------------|-------------|---------------------------|
| 1    | MCM complex (human)                               | 1.03E-04    | 195.5196078 | 1795.688136               |
| 2    | Sulphiredoxin-peroxiredoxin complex (human)       | 0.00529304  | 383.5769231 | 2010.465718               |
| 3    | snRNP-free U1A (SF-A) complex (human)             | 0.010558622 | 127.8461538 | 581.8038737               |
| 4    | hNURF complex (human)                             | 0.010558622 | 127.8461538 | 581.8038737               |
| 5    | DCS complex (Ptbp1, Ptbp2, Hnrph1, Hnrpf) (mouse) | 0.010558622 | 127.8461538 | 581.8038737               |
| 6    | TNF-alpha/NF-kappa B signaling complex 9 (human)  | 0.013181152 | 95.87980769 | 415.0605599               |
| 7    | Polycomb repressive complex 2 (PRC2) (human)      | 0.013181152 | 95.87980769 | 415.0605599               |
| 8    | MTA1-HDAC core complex (human)                    | 0.013181152 | 95.87980769 | 415.0605599               |
| 9    | WIP-WASP-actin-myosin-Ila complex (human)         | 0.015796862 | 76.7        | 318.1473008               |
| 10   | MTA1 complex (human)                              | 0.015796862 | 76.7        | 318.1473008               |
| 11   | TNF-alpha/NF-kappa B signaling complex 8 (human)  | 0.015796862 | 76.7        | 318.1473008               |
| 12   | Mi2/NuRD complex (human)                          | 0.018405771 | 63.91346154 | 255.3400953               |
| 13   | SIN3 complex (human)                              | 0.018405771 | 63.91346154 | 255.3400953               |
| 14   | HDAC2-associated core complex (human)             | 0.021007896 | 54.78021978 | 211.6081512               |
| 15   | Drosha complex (mouse)                            | 0.021007896 | 54.78021978 | 211.6081512               |
| 16   | Emerin complex 1 (human)                          | 0.021007896 | 54.78021978 | 211.6081512               |
| 17   | BRMS1-SIN3-HDAC complex (human)                   | 0.021007896 | 54.78021978 | 211.6081512               |
| 18   | NuRD.1 complex (human)                            | 0.021007896 | 54.78021978 | 211.6081512               |
| 19   | TNF-alpha/NF-kappa B signaling complex 7 (human)  | 0.021007896 | 54.78021978 | 211.6081512               |
| 20   | MeCP1 complex (human)                             | 0.023603253 | 47.93028846 | 179.5646306               |

**G2 Phase**

| Rank | CORUM Complex Term                                       | P-value     | Odds Ratio  | Combined Enrichment Score |
|------|----------------------------------------------------------|-------------|-------------|---------------------------|
| 1    | MCM complex (human)                                      | 3.17E-04    | 109.3571429 | 881.0538514               |
| 2    | Emerin complex 25 (human)                                | 0.002460223 | 31.22919937 | 187.6095227               |
| 3    | PCNA homotrimer complex (human)                          | 0.004649936 | 19907       | 106918.5424               |
| 4    | PCNA-PAF complex (human)                                 | 0.009278511 | 216.3695652 | 1012.621293               |
| 5    | PCNA-p21 complex (human)                                 | 0.009278511 | 216.3695652 | 1012.621293               |
| 6    | DJ-1-SNCA complex, high molecular weight complex (human) | 0.009278511 | 216.3695652 | 1012.621293               |
| 7    | S100A10-annexin 2 complex (mouse)                        | 0.009278511 | 216.3695652 | 1012.621293               |
| 8    | PCNA-MLH1-PMS1 complex (human)                           | 0.0138858   | 108.1793478 | 462.6710098               |
| 9    | PCNA-MSH2-MSH6 complex (human)                           | 0.0138858   | 108.1793478 | 462.6710098               |
| 10   | Emerin-actin-NMI complex (human)                         | 0.0138858   | 108.1793478 | 462.6710098               |
| 11   | PCNA-KU antigen complex (human)                          | 0.0138858   | 108.1793478 | 462.6710098               |
| 12   | Ubiquitin E3 ligase (SKP1A, SKP2, CUL1) (human)          | 0.0138858   | 108.1793478 | 462.6710098               |
| 13   | DNMT1-G9a-PCNA complex (human)                           | 0.0138858   | 108.1793478 | 462.6710098               |
| 14   | Pre-initiation complex (PIC) (human)                     | 0.0138858   | 108.1793478 | 462.6710098               |
| 15   | Ubiquitin E3 ligase (SKP1A, FBXW2, CUL1) (human)         | 0.0138858   | 108.1793478 | 462.6710098               |
| 16   | EXO1-MLH1-PCNA complex (human)                           | 0.0138858   | 108.1793478 | 462.6710098               |
| 17   | ING1-p300-PCNA complex (human)                           | 0.0138858   | 108.1793478 | 462.6710098               |
| 18   | PPD complex (human)                                      | 0.0138858   | 108.1793478 | 462.6710098               |
| 19   | HSP90-CDC37-LRRK2 complex (human)                        | 0.0138858   | 108.1793478 | 462.6710098               |
| 20   | TRPV5-S100A10-annexin 2 complex (mouse)                  | 0.0138858   | 108.1793478 | 462.6710098               |

**M Phase**

| Rank | CORUM Complex Term                                     | P-value     | Odds Ratio  | Combined Enrichment Score |
|------|--------------------------------------------------------|-------------|-------------|---------------------------|
| 1    | Spliceosome (human)                                    | 3.68E-14    | 19.59141137 | 606.0266827               |
| 2    | CDC5L complex (human)                                  | 4.20E-08    | 38.75390625 | 658.2146826               |
| 3    | C complex spliceosome (human)                          | 6.36E-08    | 17.45502646 | 289.244687                |
| 4    | Toposome (human)                                       | 6.64E-08    | 203.7230769 | 3367.11174                |
| 5    | Splicing-associated factors complex (human)            | 4.40E-04    | 100.3181818 | 775.3997122               |
| 6    | CDC5L core complex (human)                             | 6.57E-04    | 75.23484848 | 551.3464718               |
| 7    | Nop56p-associated pre-rRNA complex (human)             | 6.78E-04    | 7.739018088 | 56.47120319               |
| 8    | AP3 adaptor complex (human)                            | 9.15E-04    | 60.18484848 | 421.0691825               |
| 9    | TREX complex (human)                                   | 0.001215037 | 50.15151515 | 336.6661399               |
| 10   | Exon junction complex (human)                          | 0.001215037 | 50.15151515 | 336.6661399               |
| 11   | SF3b complex (human)                                   | 0.001215037 | 50.15151515 | 336.6661399               |
| 12   | RC complex during S-phase of cell cycle (human)        | 0.003311249 | 27.34848485 | 156.1716008               |
| 13   | RC complex during G2/M-phase of cell cycle (human)     | 0.003311249 | 27.34848485 | 156.1716008               |
| 14   | AP3-BLOC1 complex (human)                              | 0.004418547 | 23.13869464 | 125.4567151               |
| 15   | CF IIam complex (Cleavage factor IIam complex) (human) | 0.0050277   | 21.48484848 | 113.7148493               |
| 16   | Large Drosha complex (human)                           | 0.007822456 | 16.70707071 | 81.04193434               |
| 17   | Parvulin-associated pre-rRNP complex (mouse)           | 0.008338889 | 7.688057964 | 36.80138985               |
| 18   | DAXX-AXIN complex (human)                              | 0.013355322 | 149.3609023 | 644.6178019               |
| 19   | Daxx-Axin complex (mouse)                              | 0.013355322 | 149.3609023 | 644.6178019               |
| 20   | PSF-p54(nrb) complex (human)                           | 0.013355322 | 149.3609023 | 644.6178019               |

**Figure S11, Related to Figure 7. Ranked Listing of Protein Complexes that Interact with MCL-1 at Each Stage of the Cell Cycle.**

(A) Identification of exemplary established MCL-1 protein interactors by affinity enrichment mass spectrometry (AE-MS) across each stage of the cell cycle.

(B) Ranked listing of FLAG-MCL-1 bound protein complexes from lysates of HEK 293T cells at each stage of the cell cycle, as determined by cross-referencing AE-MS protein hits with the CORUM database.



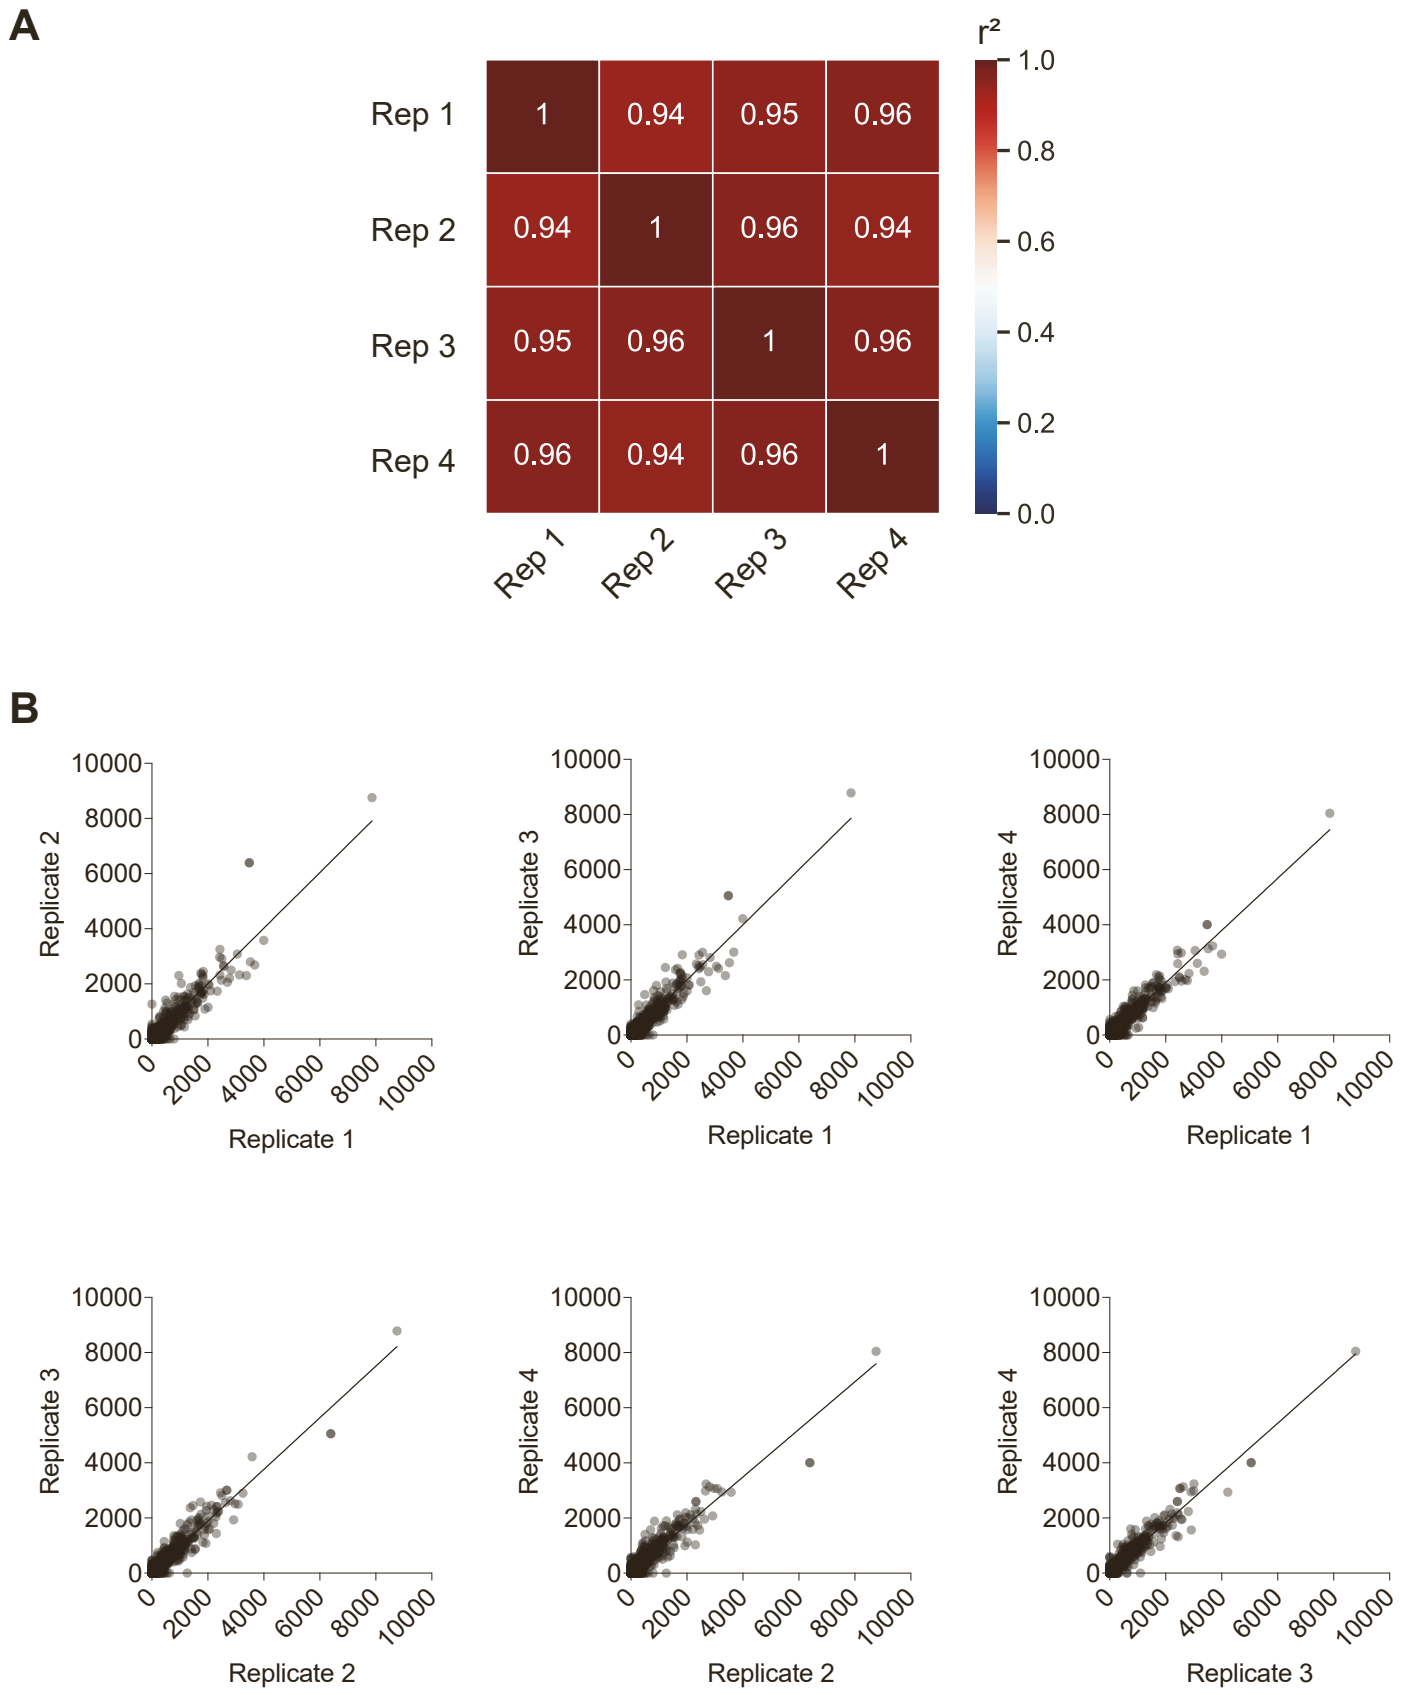

**Figure S12, Related to Figure 7. Replicates of AP-MS.**

(A) Summary table of Pearson correlations for biological replicates of the AP-MS analyses of anti-MCL-1 immunoprecipitates from lysates of wild-type MEFs.

(B) Pairwise scatter plots of normalized spectral abundance factors (NSAFs) for the identified proteins among biological replicates. For all plots, statistical significance of the correlation is  $p < 0.0001$ .

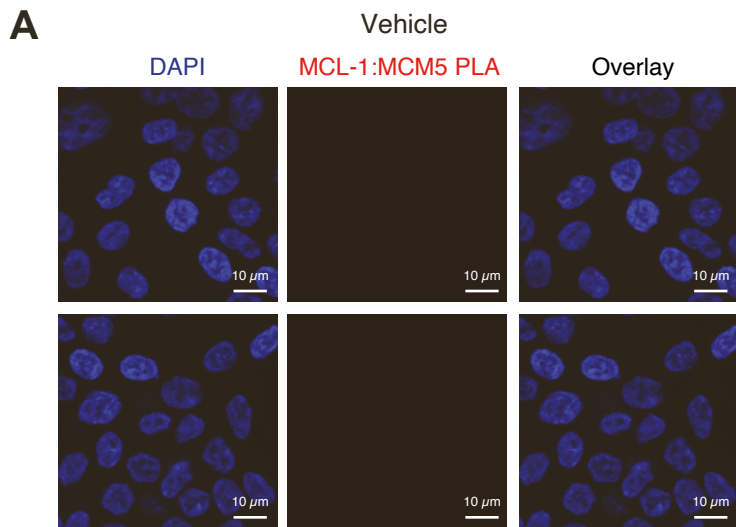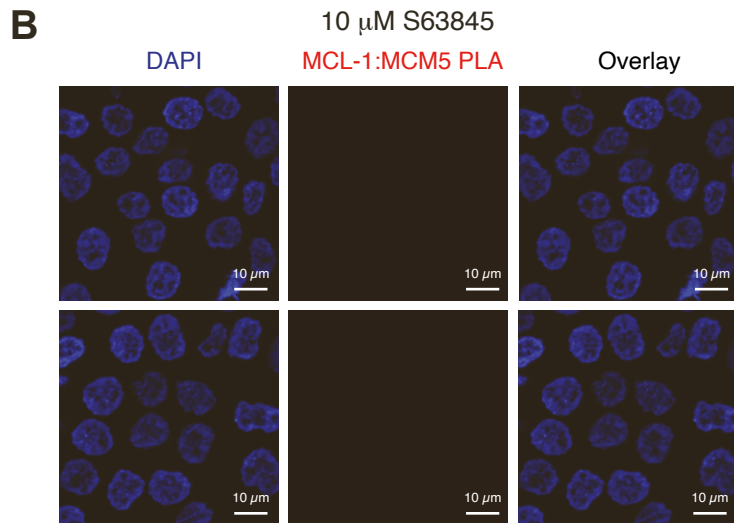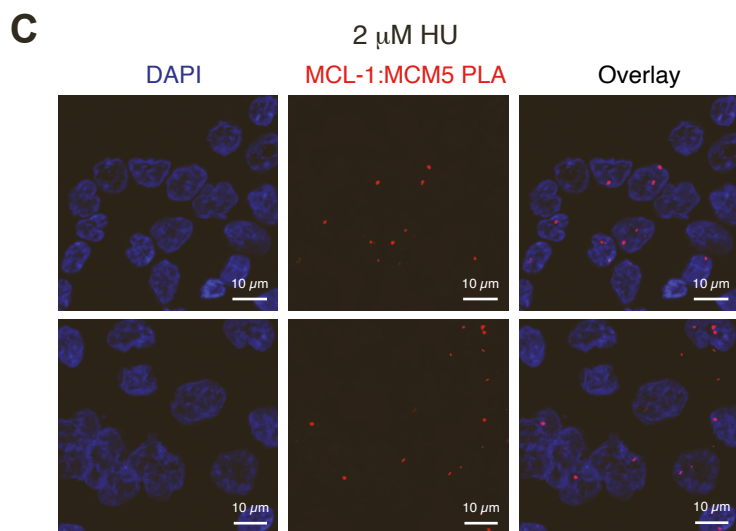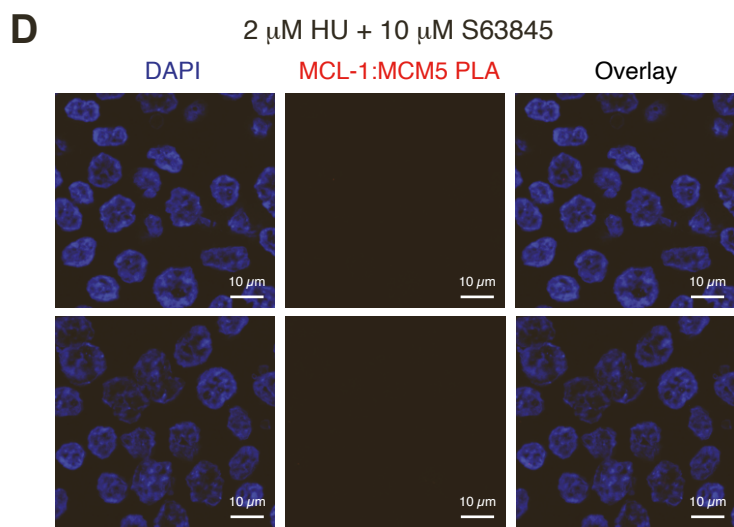

**Figure S13, Related to Figure 7. Induction of the MCL-1/MCM5 Interaction upon Replicative Stress as Detected by Proximity Ligation Assay.**

(A-D) Representative images of MCL-1:MCM5 PLA foci (red) in *Bax<sup>-/-</sup>Bak<sup>-/-</sup>* HCT116 cells subjected to vehicle (0.1% DMSO) (A), 10  $\mu$ M S63845 (B), 2  $\mu$ M hydroxyurea (C), or co-treatment with 10  $\mu$ M S63845 and 2  $\mu$ M hydroxyurea (D). Nuclei were stained with DAPI (blue).
